# Supplementary material
Source: PubMed Central journal article supplement (PMC2683099)
Supplement: 0809063106_0809063106SI.pdf [file 0809063106_0809063106SI.pdf]

# Supporting Information

Humphries 10.1073/pnas.0809063106

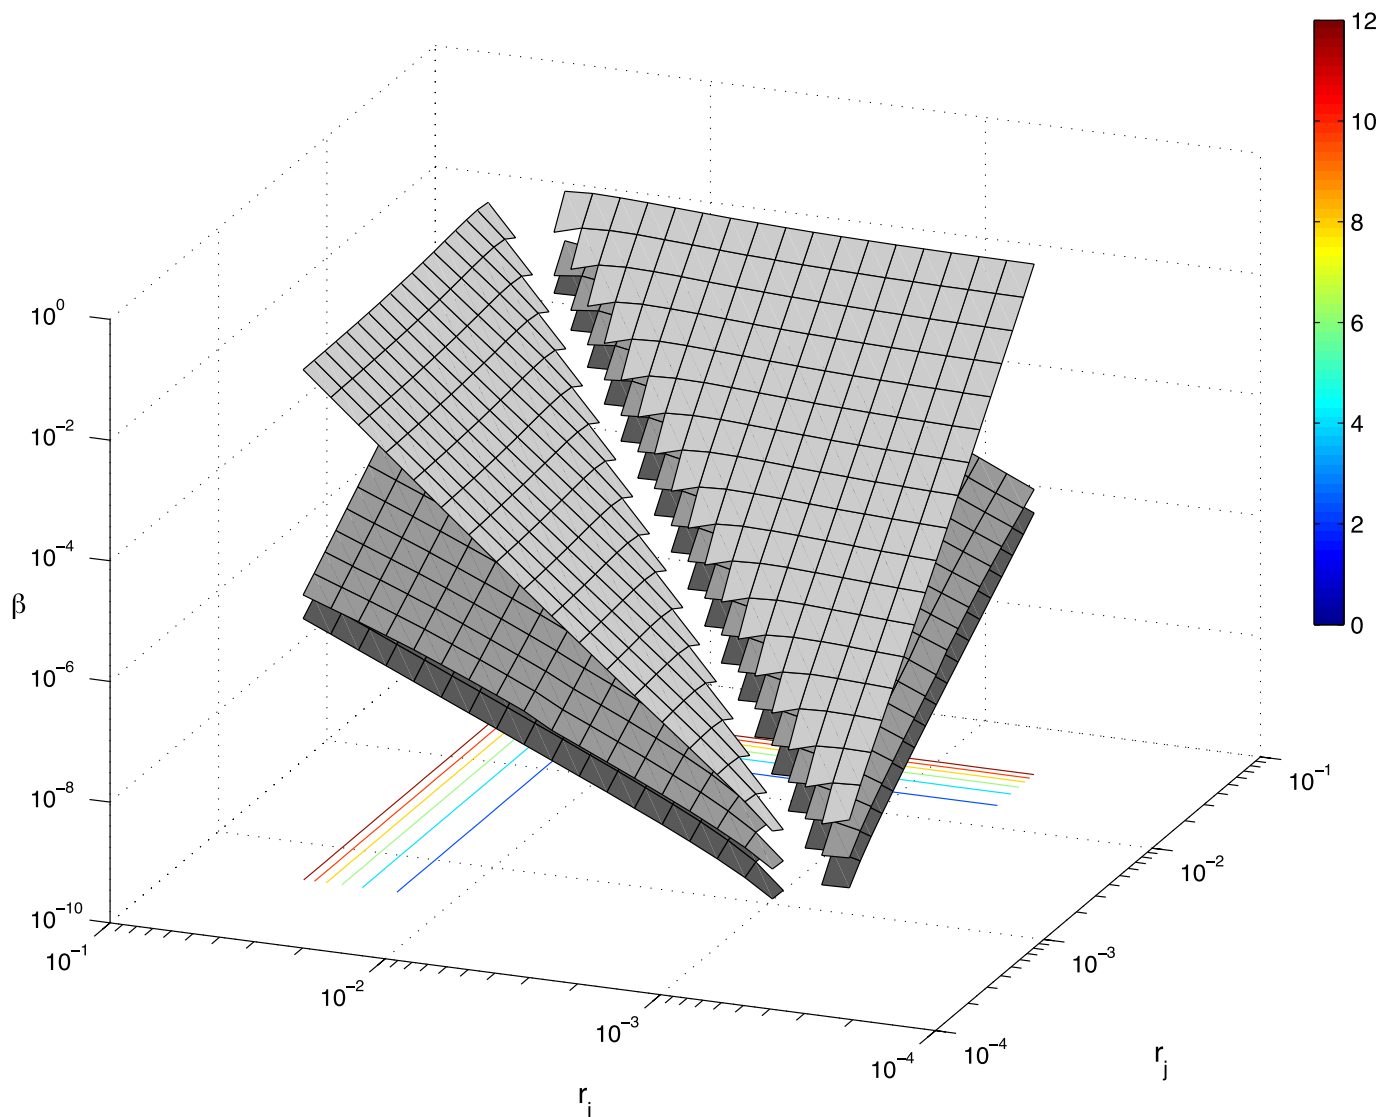

**Fig. S1.** Three-dimensional surface plots of coagulation kernels ( $\beta_{ij}$ ) for differential sedimentation of two spheres of radius  $r_i$  and  $r_j$ . Light gray, rectilinear kernel; gray, intermediate  $Re$  kernel; dark gray, curvilinear kernel. Breaks occur where identically sized spheres do not coagulate. Coloured contour map and color bar show  $Re$  values for spheres with excess density of 0.064. Note the logged axes.

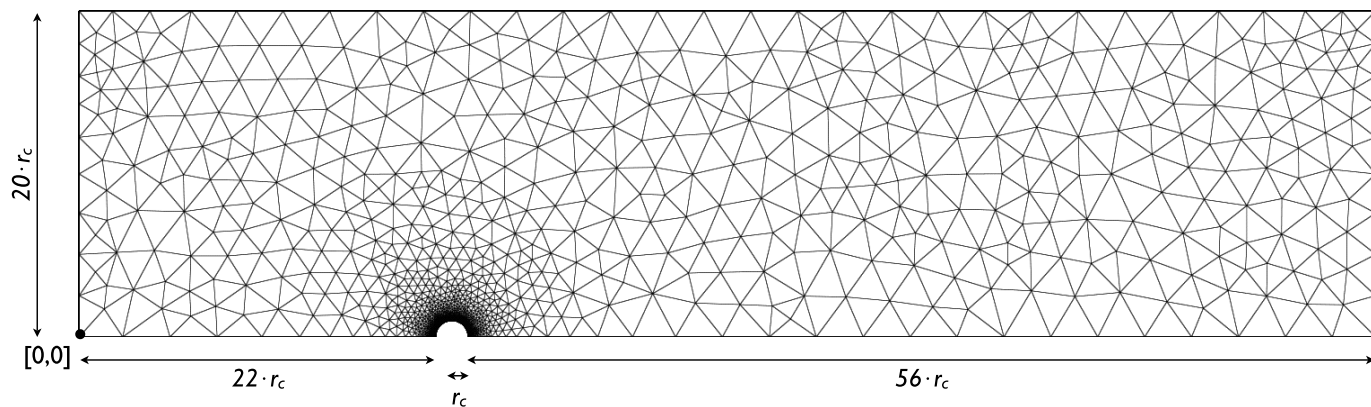

Fig. S2. The computational geometry for the cylinder. All dimensions are relative to the cylinder radius ( $r_c$ ). Fluid flow is from the left to the right. The left boundary describes a constant inlet velocity normal to the boundary, while the right boundary describes a constant outflow pressure. The upper boundary is an open boundary with normal stress conditions, whereas the lower (excluding the cylinder surface) is a symmetry boundary. A no-slip condition was applied to the surface of the cylinder. Mesh consists of 3,419 triangular elements.



Table S1. Filter feeder morphology

| Taxon            | Species                            | Mean element width, m | Source                       | Ref(s).        |
|------------------|------------------------------------|-----------------------|------------------------------|----------------|
| Ave              | <i>Anas rhynchotis</i>             | 1.70E-04              | Text                         | 1              |
| Ave              | <i>Malacorhynchus membranaceus</i> | 1.00E-04              | Text                         | 1              |
| Bivalve          | <i>Mytilus edulis</i>              | 6.00E-08              | Text                         | 2              |
| Bryozoan         | <i>Crisia eburnea</i>              | 1.00E-05              | Micrograph                   | 3              |
| Bryozoan         | <i>Plumatella repens</i>           | 1.50E-05              | Text                         | 4              |
| Cetacean         | <i>Balaena mysticetus</i>          | 3.34E-04              | Text, Text                   | 5, 6           |
| Cetacean         | <i>Balaenoptera acutorostrata</i>  | 2.85E-04              | Text                         | 6              |
| Cetacean         | <i>Balaenoptera borealis</i>       | 2.29E-04              | Text                         | 6              |
| Cetacean         | <i>Balaenoptera edeni</i>          | 5.77E-04              | Text                         | 6              |
| Cetacean         | <i>Balaenoptera musculus</i>       | 1.07E-03              | Text                         | 6              |
| Cetacean         | <i>Balaenoptera physalus</i>       | 7.65E-04              | Text, Text                   | 6, 7           |
| Cetacean         | <i>Caperea marginata</i>           | 7.25E-05              | Text                         | 6              |
| Cetacean         | <i>Eschrichtius robustus</i>       | 1.00E-03              | Text                         | 6              |
| Cetacean         | <i>Megaptera novaeangliae</i>      | 7.00E-04              | Text                         | 6              |
| Choanoflagellate | <i>Codosiga botrytis</i>           | 1.70E-07              | Text, Text                   | 8, 9           |
| Cnidarian        | <i>Acropora cervicornis</i>        | 2.50E-04              | Micrograph                   | 10             |
| Cnidarian        | <i>Alcyonium siderum</i>           | 6.00E-05              | Text                         | 11             |
| Cnidarian        | <i>Anthopleura elegantissima</i>   | 2.00E-03              | Text                         | 12             |
| Cnidarian        | <i>Dendronephthya hemprichi</i>    | 5.00E-05              | Text                         | 13             |
| Cnidarian        | <i>Galaxea fascicularis</i>        | 7.50E-04              | Micrograph                   | 14             |
| Cnidarian        | <i>Metridium senile</i>            | 1.20E-03              | Text                         | 11             |
| Cnidarian        | <i>Montipora digitata</i>          | 1.38E-04              | Micrograph                   | 10             |
| Cnidarian        | <i>Palythoa variabilis</i>         | 1.00E-03              | Text                         | 15             |
| Cnidarian        | <i>Pocillopora damicornis</i>      | 1.60E-04              | Micrograph                   | 10             |
| Cnidarian        | <i>Porites cylindrica</i>          | 1.70E-04              | Micrograph                   | 10             |
| Cnidarian        | <i>Ptilosarcus gurneyi</i>         | 4.00E-05              | Text                         | 16             |
| Crustacean       | <i>Bosmina longirostris</i>        | 3.60E-07              | Micrograph                   | 17             |
| Crustacean       | <i>Centropages furcatus</i>        | 2.00E-06              | Micrograph                   | 18             |
| Crustacean       | <i>Centropages hamatus</i>         | 8.00E-07              | Micrograph                   | 19             |
| Crustacean       | <i>Centropages typicus</i>         | 3.60E-06              | Text                         | 20             |
| Crustacean       | <i>Ceriodaphnia lacustris</i>      | 1.50E-07              | Micrograph                   | 17             |
| Crustacean       | <i>Ceriodaphnia quadrangula</i>    | 8.00E-08              | Text                         | 21             |
| Crustacean       | <i>Chydorus sphaericus</i>         | 8.00E-08              | Text                         | 21             |
| Crustacean       | <i>Daphnia carinata</i>            | 2.90E-07              | Text                         | 22             |
| Crustacean       | <i>Daphnia cucullata</i>           | 1.10E-07              | Text                         | 21             |
| Crustacean       | <i>Daphnia galeata</i>             | 1.90E-07              | Text                         | 21             |
| Crustacean       | <i>Daphnia hyalina</i>             | 3.20E-07              | Text                         | 21             |
| Crustacean       | <i>Daphnia magna</i>               | 2.78E-07              | Text, Text, Micrograph, Text | 17, 21, 23, 24 |
| Crustacean       | <i>Daphnia parvula</i>             | 3.20E-07              | Micrograph                   | 17             |
| Crustacean       | <i>Daphnia pulicaria</i>           | 2.75E-07              | Text                         | 21             |
| Crustacean       | <i>Diaphanosoma brachyurum</i>     | 5.00E-08              | Text                         | 21             |
| Crustacean       | <i>Eubosmina coregoni</i>          | 2.10E-07              | Text                         | 21             |
| Crustacean       | <i>Eucalanus pileatus</i>          | 2.00E-06              | Text                         | 21             |
| Crustacean       | <i>Euphausia superba</i>           | 3.00E-07              | Text                         | 25             |
| Crustacean       | <i>Holopedium gibberum</i>         | 4.00E-07              | Text                         | 21             |
| Crustacean       | <i>Lepas pectinata</i>             | 2.80E-04              | Scaled drawing               | 26             |
| Crustacean       | <i>Meganctiphanes norvegica</i>    | 4.00E-07              | Text                         | 25             |
| Crustacean       | <i>Nyctiphanes australis</i>       | 4.00E-07              | Micrograph                   | 27             |
| Crustacean       | <i>Pleuromamma borealis</i>        | 1.00E-06              | Micrograph                   | 19             |
| Crustacean       | <i>Sida crystallina</i>            | 3.00E-07              | Text                         | 21             |
| Echinoderm       | <i>Amphiura filiformis</i>         | 1.00E-04              | Text                         | 28             |
| Echinoderm       | <i>Antedon bifida</i>              | 2.90E-05              | Micrograph                   | 29             |
| Echinoderm       | <i>Capillaster multiradiatus</i>   | 4.70E-05              | Text                         | 30             |
| Echinoderm       | <i>Cenometra bella</i>             | 4.40E-05              | Text                         | 30             |
| Echinoderm       | <i>Colobometra perspinosa</i>      | 4.00E-05              | Text                         | 30             |
| Echinoderm       | <i>Comanthina schlegeli</i>        | 4.10E-05              | Text                         | 30             |
| Echinoderm       | <i>Comanthus bennetti</i>          | 5.50E-05              | Text                         | 30             |
| Echinoderm       | <i>Comanthus parvicirrus</i>       | 4.70E-05              | Text                         | 30             |
| Echinoderm       | <i>Comaster gracilis</i>           | 4.20E-05              | Text                         | 30             |
| Echinoderm       | <i>Comaster multifidus</i>         | 6.80E-05              | Text                         | 30             |
| Echinoderm       | <i>Comatella nigra</i>             | 5.40E-05              | Text                         | 30             |
| Echinoderm       | <i>Florometra serratissima</i>     | 2.69E-04              | Micrograph                   | 31             |
| Echinoderm       | <i>Himerometra magnipinna</i>      | 2.80E-05              | Text                         | 30             |
| Echinoderm       | <i>Himerometra robustipinna</i>    | 3.40E-05              | Text                         | 30             |

| Taxon        | Species                               | Mean element width, m | Source                 | Ref(s). |
|--------------|---------------------------------------|-----------------------|------------------------|---------|
| Echinoderm   | <i>Lamprometra palmata</i>            | 3.60E-05              | Text                   | 30      |
| Echinoderm   | <i>Oligometra serripina</i>           | 4.00E-05              | Text, Text             | 30, 32  |
| Echinoderm   | <i>Ophiopholis aculeata</i>           | 2.17E-04              | Text                   | 33      |
| Echinoderm   | <i>Ophiopteris antipodium</i>         | 4.00E-04              | Text                   | 34      |
| Echinoderm   | <i>Ophiothrix fragilis</i>            | 1.92E-04              | Text                   | 35      |
| Echinoderm   | <i>Pontiometra andersoni</i>          | 3.20E-05              | Text                   | 30      |
| Echinoderm   | <i>Tropiometra afra</i>               | 3.60E-05              | Text                   | 30      |
| Fish         | <i>Brevoortia tyrannus</i>            | 1.00E-05              | Text                   | 36      |
| Fish         | <i>Polyodon spathula</i>              | 3.39E-04              | Text                   | 37      |
| Hemichordate | <i>Harrimania planktophilus</i>       | 3.00E-07              | Micrograph             | 38      |
| Hemichordate | <i>Rhabdopleura normani</i>           | 1.25E-05              | Text                   | 39      |
| Holothurian  | <i>Psolus chitinooides</i>            | 3.40E-04              | Text                   | 40      |
| Insect       | <i>Chimarra socia</i>                 | 3.50E-07              | Text                   | 41      |
| Insect       | <i>Hydropsyche siltalai</i>           | 1.06E-05              | Text                   | 42      |
| Insect       | <i>Hydropsyche pellucida</i>          | 1.75E-05              | Micrograph             | 43      |
| Insect       | <i>Isonychia campestris</i>           | 8.20E-06              | Micrograph             | 44      |
| Insect       | <i>Macronema zebratum</i>             | 1.43E-06              | Text                   | 41      |
| Insect       | <i>Simulium vittatum</i>              | 5.00E-06              | Micrograph, Text       | 22, 45  |
| Phoronid     | <i>Phoronis muelleri</i>              | 1.05E-05              | Micrograph             | 46      |
| Phoronid     | <i>Phoronis muelleri</i> (larva)      | 2.50E-05              | Micrograph             | 46      |
| Polychaete   | <i>Boccardia proboscidea</i>          | 1.90E-04              | Text                   | 47      |
| Polychaete   | <i>Chaetopterus variopedatus</i>      | 1.00E-08              | Text                   | 48      |
| Polychaete   | <i>Eupolymnia heterobranchia</i>      | 1.00E-04              | Text                   | 49      |
| Polychaete   | <i>Nereis diversicolor</i>            | 5.00E-09              | Text                   | 50      |
| Polychaete   | <i>Paraprionospio pinnata</i>         | 1.32E-04              | Micrograph             | 51      |
| Polychaete   | <i>Phragmatopoma californica</i>      | 5.00E-05              | Text                   | 52      |
| Polychaete   | <i>Polydora ligni</i>                 | 1.68E-04              | Text                   | 47      |
| Polychaete   | <i>Pseudopolydora kempji japonica</i> | 1.61E-04              | Text, Text             | 47, 53  |
| Polychaete   | <i>Pseudopolydora paucibranchiata</i> | 1.14E-04              | Text, Text             | 53, 54  |
| Polychaete   | <i>Pygospio elegans</i>               | 4.99E-04              | Micrograph, Text       | 47, 55  |
| Polychaete   | <i>Sabellaria alveolata</i>           | 5.75E-05              | Text                   | 56      |
| Polychaete   | <i>Sabella pavonina</i>               | 1.70E-04              | Text                   | 40      |
| Polychaete   | <i>Scololepsis squamata</i>           | 1.15E-04              | Micrograph, Micrograph | 51, 55  |
| Polychaete   | <i>Spio filicornis</i>                | 9.00E-05              | Micrograph             | 55      |
| Protist      | <i>Actinomonas mirabilis</i>          | 2.00E-07              | Text                   | 57      |
| Protist      | <i>Monosiga</i>                       | 1.00E-07              | Text                   | 57      |
| Pteropod     | <i>Gleba cordata</i>                  | 1.00E-06              | Text                   | 58      |
| Tunicate     | <i>Ascidella aspera</i>               | 1.50E-08              | Text                   | 59      |
| Tunicate     | <i>Ciona intestinalis</i>             | 1.88E-08              | Text, Text             | 59, 60  |
| Tunicate     | <i>Doliolum nationalis</i>            | 2.90E-08              | Text                   | 61      |
| Tunicate     | <i>Halocynthia papillosa</i>          | 2.75E-08              | Text                   | 59      |
| Tunicate     | <i>Microcosmus sabatieri</i>          | 1.25E-08              | Text                   | 59      |
| Tunicate     | <i>Oikopleura labrodoriensis</i>      | 2.00E-08              | Text, Text             | 62, 63  |
| Tunicate     | <i>Oikopleura vanhoeffeni</i>         | 2.03E-07              | Text                   | 64      |
| Tunicate     | <i>Pegea confoederata</i>             | 1.00E-07              | Text                   | 65      |
| Tunicate     | <i>Phallusia mammilata</i>            | 1.88E-08              | Text, Text             | 59, 60  |
| Tunicate     | <i>Salpa fusiformis</i>               | 2.00E-07              | Text                   | 66      |
| Tunicate     | <i>Styela plicata</i>                 | 1.50E-08              | Text                   | 59      |
| Tunicate     | <i>Thalia democratica</i>             | 4.00E-08              | Text                   | 67      |

1. Crome FHJ (1985) *Austr J Zool* 33:849–862.
2. Owen G (1974) *Proc R Soc London Ser B* 187:83–91.
3. Nielsen C, Riisgård HU (1998) *Mar Ecol Progr Ser* 168:163–186.
4. Riisgård HU, Nielsen KK, Fuchs J, Rasmussen BF, Obst M, Funch P (2004) *Invertebrate Biol* 123:156–167.
5. Lambertsens RH, Rasmussen KJ, Lancaster WC, Hintz RJ (2005) *J Mammal* 86:342–352.
6. Sekiguchi K, Best PB, Kaczmaruk BZ (1992) *Mar Mammal Sci* 8:288–293.
7. Kawamura A (1980) *Sci Rep Whales Res Inst* 32:155–197.
8. Hibberd DJ (1975) *J Cell Sci* 17:191–219.
9. Fjerdingstad EJ (1961) *Zeitschrift für Zelforschung* 54:499–510.
10. Anthony KRN (1999) *J Exp Marine Biol Ecol* 232:85–106.
11. Sebens KP, Koehl MAR (1984) *Marine Biol* 81:255–271.
12. Rubenstein DI, Koehl MAR (1977) *Am Nat* 111:981–994.
13. Fabricius KE, Genin A, Benayahu Y (1995) *Limnol Oceanogr* 40:1290–1301.
14. Marshall AT, Clode P (2004) *Coral Reefs* 23:277–280.
15. Koehl MAR (1977) *Proc 3rd Int Coral Reef Symp* 2:437–444.
16. Best BA (1988) *Biol Bull* 175:332–342.
17. Porter KG, Feig YS, Vetter EF (1983) *Oecologia* 58:156–163.
18. Koehl MAR (1995) *Soc Exp Biol Symp* 157–182.

19. Koehl MAR (1983) *J Theor Biol* 105:1–11.
20. Koehl MAR, Strickler JR (1981) *Limnol Oceanogr* 26:1062–1073.
21. Geller W, Müller H (1981) *Oecologia* 49:316–321.
22. Cheer AY, Koehl MAR (1987) *IMA J Math Appl Med Biol* 4:185–199.
23. Gerritsen J, Porter KG, Strickler JR (1988) *Bull Mar Sci* 43:366–376.
24. Gerritsen J, Porter KG (1982) *Science* 216:1225–1227.
25. McClatchie S, Boyd CM (1983) *Can J Fish Aquat Sci* 40:955–967.
26. Anderson DT (1980) *Proc Linnear Soc NSW* 104:147–159.
27. Dalley DD, McClatchie SM (1989) *Mar Biol* 101:195–203.
28. Loo L-O, Jonsson PR, Sköld M, Karlsson Ö (1996) *Mar Ecol Progr Ser* 139:143–155.
29. Lahaye MC, Jangoux M (1985) *Mar Biol* 86:307–318.
30. Meyer DL (1979) *Mar Biol* 51:361–369.
31. Byrne M, Fontaine AR (1983) *Zoomorphology* 102:175–187.
32. Holland ND, Strickler JR, Leonard AB (1986) *Mar Biol* 93:111–126.
33. LaBarbera M (1978) *Science* 201:1147–1149.
34. Pentreath RJ (1970) *J Zool* 161:395–429.
35. Allen JR (1998) *Mar Biol* 132:383–390.
36. Friedl KD (1985) *Copeia* 4:1018–1027.
37. Rosen RA, Hales DC (1981) *Copeia* 2:441–455.
38. Cameron CB (2002) *Biol Bull* 202:192–200.
39. Halanych KM (1993) *Biol Bull* 185:417–427.
40. Shimeta J, Jumars PA (1991) *Mar Biol Ann Rev* 29:191–257.
41. Silvester NR (1983) *J Theor Biol* 103:265–286.
42. Brown SA, Ruxton GD, Humphries S (2004) *J N Am Benthol Soc* 23:771–779.
43. Michalak M, Tszedel M, Bilska J, Kruci&acute;nacut;ska I (2005) *Fibres Textiles Eastern Eur* 13:28–32.
44. Braimah SA (1987) *Can J Zool* 65: 504–513.
45. Ross DH, Craig DA (1980) *Can J Zool* 58:1186–1192.
46. Riisgård HU (2002) *Mar Biol* 141:75–87.
47. Hentschel BT (1996) *J Exp Mar Biol Ecol* 206:1–24.
48. Flood PR, Fiala-Médioni A (1982) *Mar Biol* 72:27–33.
49. Johnson AS (1993) *Biol Bull* 185:10–19.
50. Riisgård HU, Vedel A, Boye H, Larsen PS (1992) *Mar Ecol Prog Ser* 83:79–89.
51. Dauer DM (1985) *Mar Biol* 85:143–151.
52. Amieva MR, Reed CG (1987) *Mar Biol* 95:243–258.
53. Shimeta J, Koehl MAR (1997) *J Exp Mar Biol Ecol* 209:47–73.
54. Shimeta J (1996) *Mar Biol* 126:479–488.
55. Jesling J (2002) *Zoomorphology* 121:213–220.
56. Dubois S, Barillé L, Cognie B, Beninger PG (2005) *Mar Ecol Progr Ser* 310:159–171.
57. Fenchel T (1982) *Mar Ecol Prog Ser* 8:211–223.
58. Gilmer RW (1974) *J Exp Mar Biol Ecol* 15:127–144.
59. Flood PR, Fiala-Médioni A (1981) *Acta Zoologica* 62:53–65.
60. Flood PR, Fiala-Médioni A (1979) *Acta Zoologica* 60:271–272.
61. Bone Q, Braconnot JC, Carre C, Ryan KP (1997) *J Exp Mar Biol Ecol* 214:179–193.
62. Flood P (1981) *Biomed Res Tokyo* 2:49–53.
63. Flood PR (1991) *Mar Biol* 111:95–111.
64. Deibel D, Powell CVL (1987) *Mar Ecol Progr Ser* 35:243–250.
65. Bone Q, Braconnot JC, Ryan KP (1991) *Acta Zoologica* 72:55–60.
66. Bone Q, Carré C, Ryan KP (2000) *J Mar Biol Assoc UK* 80:523–534.
67. Bone Q, Carré C, Chang P (2003) *J Mar Biol Assoc UK* 83:907–919.
